# Supplementary material for: Insights into the Activation of a Crustacean G Protein-Coupled Receptor: Evaluation of the Red Pigment-Concentrating Hormone Receptor of the Water Flea Daphnia pulex (Dappu-RPCH R)
Source: MDPI journal article supplement (doi:10.3390/biom11050710), 2021-05-10
Supplement: s1 [file s1]

**Table S1.** Student's t-test of null hypothesis of mean  $\Delta G$  of binding relative to Dappu-RPCH binding to Dappu-RPCH R. The t-critical value is 2.01 for all the peptides except for pEVNFSPSWG N for which it is 1.97.

| Peptide      | t-stat | Significance |
|--------------|--------|--------------|
| Ace          | 1.49   | no           |
| Ala2         | 2.06   | yes          |
| Ala3         | 5.11   | yes          |
| Ala4         | 0.30   | no           |
| Ala5         | 4.71   | yes          |
| Ala6         | 5.96   | yes          |
| Ala7         | 3.31   | yes          |
| Ala8         | 10.01  | yes          |
| COOH         | 1.18   | no           |
| Gly5         | 0.59   | no           |
| Gly6         | 3.53   | yes          |
| Anaim-AKH    | 0.28   | no           |
| Grybi-AKH    | 0.57   | no           |
| Argsi-RPCH   | 5.18   | yes          |
| Gly8         | 8.93   | yes          |
| pEVNFSPSWG N | 2.62   | yes          |
